# Supplementary material for: Evidence That Skeletal Muscles Modulate HDL-Cholesterol in Metabolic Healthy Young Adults
Source: MDPI journal article supplement (doi:10.3390/nu16081110), 2024-04-10
Supplement: s1 [file s1]

## Outcome: total cholesterol

### NORMAL WEIGHT SUBJECTS (n=55)

| Characteristic           | Beta  | 95% CI <sup>†</sup> | p-value |
|--------------------------|-------|---------------------|---------|
| Age                      | 2.3   | 0.60, 4.0           | 0.009   |
| Sex: male=0, female=1    | 18    | -26, 63             | 0.405   |
| BMI                      | 3.0   | -5.7, 12            | 0.494   |
| Waist circumference (cm) | -0.02 | -2.1, 2.1           | 0.988   |
| SMI (Kg/m <sup>2</sup> ) | 5.3   | -11, 22             | 0.519   |

### OVERWEIGHT SUBJECTS (n=149)

| Characteristic           | Beta  | 95% CI <sup>†</sup> | p-value |
|--------------------------|-------|---------------------|---------|
| Age                      | 1.4   | 0.58, 2.3           | 0.001   |
| Sex: male=0, female=1    | -20   | -42, 2.1            | 0.076   |
| BMI                      | 0.67  | -3.8, 5.2           | 0.768   |
| Waist circumference (cm) | -0.19 | -1.2, 0.78          | 0.697   |
| SMI (Kg/m <sup>2</sup> ) | -4.2  | -11, 2.6            | 0.221   |

### Obesi 246 soggetti

| Characteristic           | Beta  | 95% CI <sup>†</sup> | p-value |
|--------------------------|-------|---------------------|---------|
| Age                      | 1.6   | 0.93, 2.3           | <0.001  |
| Sex: male=0, female=1    | -11   | -27, 4.4            | 0.160   |
| BMI                      | -0.41 | -2.1, 1.3           | 0.638   |
| Waist circumference (cm) | 0.07  | -0.54, 0.68         | 0.827   |
| SMI (Kg/m <sup>2</sup> ) | 0.37  | -4.7, 5.5           | 0.885   |

## Outcome: colesterolo HDL

### NORMAL WEIGHT SUBJECTS (n=55)

| Characteristic           | Beta | 95% CI <sup>†</sup> | p-value |
|--------------------------|------|---------------------|---------|
| Age                      | 0.19 | -0.40, 0.77         | 0.522   |
| Sex: male=0, female=1    | 15   | 0.31, 30            | 0.046   |
| BMI                      | 0.44 | -2.5, 3.4           | 0.767   |
| Waist circumference (cm) | 0.18 | -0.53, 0.90         | 0.613   |
| SMI (Kg/m <sup>2</sup> ) | 2.4  | -3.1, 8.0           | 0.388   |

### OVERWEIGHT SUBJECTS (n=149)

| Characteristic           | Beta  | 95% CI <sup>†</sup> | p-value |
|--------------------------|-------|---------------------|---------|
| Age                      | 0.06  | -0.21, 0.32         | 0.666   |
| Sex: male=0, female=1    | 4.5   | -2.4, 11            | 0.196   |
| BMI                      | -0.15 | -1.6, 1.3           | 0.830   |
| Waist circumference (cm) | -0.09 | -0.39, 0.22         | 0.567   |
| SMI (Kg/m <sup>2</sup> ) | -1.7  | -3.8, 0.41          | 0.112   |

### PATIENTS WITH OBESITY (n=246)

| Characteristic           | Beta  | 95% CI <sup>†</sup> | p-value      |
|--------------------------|-------|---------------------|--------------|
| Age                      | 0.20  | -0.01, 0.40         | 0.062        |
| Sex: male=0, female=1    | 2.6   | -2.2, 7.4           | 0.281        |
| BMI                      | 0.25  | -0.28, 0.78         | 0.351        |
| Waist circumference (cm) | -0.14 | -0.33, 0.05         | 0.138        |
| SMI (Kg/m <sup>2</sup> ) | -1.6  | -3.2, -0.03         | <b>0.046</b> |

## Outcome: colesterolo LDL

### NORMAL WEIGHT SUBJECTS (n=55)

| Characteristic           | Beta  | 95% CI <sup>†</sup> | p-value |
|--------------------------|-------|---------------------|---------|
| Age                      | 1.8   | 0.44, 3.2           | 0.011   |
| Sex: male=0, female=1    | 9.2   | -26, 45             | 0.601   |
| BMI                      | 2.2   | -4.8, 9.1           | 0.535   |
| Waist circumference (cm) | -0.22 | -1.9, 1.5           | 0.790   |
| SMI (Kg/m <sup>2</sup> ) | 2.8   | -10, 16             | 0.666   |

### OVERWEIGHT SUBJECTS (n=149)

| Characteristic           | Beta  | 95% CI <sup>†</sup> | p-value |
|--------------------------|-------|---------------------|---------|
| Age                      | 1.3   | 0.54, 2.0           | <0.001  |
| Sex: male=0, female=1    | -14   | -33, 4.6            | 0.138   |
| BMI                      | -0.16 | -4.0, 3.7           | 0.933   |
| Waist circumference (cm) | -0.05 | -0.87, 0.77         | 0.905   |
| SMI (Kg/m <sup>2</sup> ) | -3.0  | -8.7, 2.7           | 0.305   |

### PATIENTS WITH OBESITY (n=246)

| Characteristic           | Beta  | 95% CI <sup>†</sup> | p-value |
|--------------------------|-------|---------------------|---------|
| Age                      | 1.3   | 0.72, 1.9           | <0.001  |
| Sex: male=0, female=1    | -11   | -25, 2.7            | 0.113   |
| BMI                      | -0.30 | -1.8, 1.2           | 0.700   |
| Waist circumference (cm) | -0.07 | -0.61, 0.48         | 0.809   |
| SMI (Kg/m <sup>2</sup> ) | 0.58  | -4.0, 5.1           | 0.802   |

## Outcome: Triglycerides

### NORMAL WEIGHT SUBJECTS (n=55)

| Characteristic           | Beta | 95% CI <sup>†</sup> | p-value |
|--------------------------|------|---------------------|---------|
| Age                      | 1.6  | -1.0, 4.2           | 0.226   |
| Sex: male=0, female=1    | -31  | -97, 36             | 0.360   |
| BMI                      | 1.9  | -11, 15             | 0.771   |
| Waist circumference (cm) | 0.13 | -3.0, 3.3           | 0.935   |
| SMI (Kg/m <sup>2</sup> ) | 0.26 | -24, 25             | 0.983   |

### OVERWEIGHT SUBJECTS (n=149)

| Characteristic           | Beta  | 95% CI <sup>†</sup> | p-value |
|--------------------------|-------|---------------------|---------|
| Age                      | 0.56  | -1.0, 2.1           | 0.484   |
| Sex: male=0, female=1    | -52   | -93, -11            | 0.014   |
| BMI                      | 4.9   | -3.5, 13            | 0.249   |
| Waist circumference (cm) | -0.26 | -2.1, 1.5           | 0.774   |
| SMI (Kg/m <sup>2</sup> ) | 2.5   | -10, 15             | 0.697   |

### PATIENTS WITH OBESITY (n=246)

| Characteristic           | Beta | 95% CI <sup>†</sup> | p-value |
|--------------------------|------|---------------------|---------|
| Age                      | 0.44 | -0.70, 1.6          | 0.450   |
| Sex: male=0, female=1    | -13  | -40, 13             | 0.332   |
| BMI                      | -1.8 | -4.7, 1.1           | 0.223   |
| Waist circumference (cm) | 1.4  | 0.34, 2.4           | 0.009   |
| SMI (Kg/m <sup>2</sup> ) | 7.0  | -1.7, 16            | 0.115   |
