# Supplementary material for: Evidence That Skeletal Muscles Modulate HDL-Cholesterol in Metabolic Healthy Young Adults
Source: MDPI journal article supplement (doi:10.3390/nu16081110), 2024-04-10
Supplement: s1 [file s1]

| PATIENT NUMBER | SMI   | SMI tertiles | HDL-Colesterol (mg/dL) | LDL-Colesterolo (mg/dL) | Triglycerides (mg/dL) |
|----------------|-------|--------------|------------------------|-------------------------|-----------------------|
| 1              | 7,58  | 1            | 56,00                  | 139,60                  | 57,00                 |
| 2              | 8,20  | 1            | 49,00                  | 131,00                  | 170,00                |
| 3              | 8,28  | 1            | 58,00                  | 82,20                   | 54,00                 |
| 4              | 8,40  | 1            | 54,00                  | 68,00                   | 40,00                 |
| 5              | 8,49  | 1            | 60,00                  | 101,00                  | 70,00                 |
| 6              | 8,49  | 1            | 56,00                  | 72,00                   | 40,00                 |
| 7              | 8,55  | 1            | 56,00                  | 82,40                   | 43,00                 |
| 8              | 8,58  | 1            | 50,00                  | 63,74                   | 51,30                 |
| 9              | 8,61  | 1            | 54,00                  | 126,00                  | 110,00                |
| 10             | 8,61  | 1            | 48,00                  | 98,00                   | 65,00                 |
| 11             | 8,76  | 1            | 60,00                  | 101,40                  | 63,00                 |
| 12             | 8,78  | 1            | 61,00                  | 62,40                   | 38,00                 |
| 13             | 8,88  | 1            | 71,00                  | 170,60                  | 162,00                |
| 14             | 8,89  | 1            | 71,00                  | 154,40                  | 58,00                 |
| 15             | 8,89  | 1            | 58,00                  | 97,00                   | 70,00                 |
| 16             | 8,89  | 1            | 68,00                  | 68,80                   | 126,00                |
| 17             | 8,96  | 1            | 40,00                  | 106,60                  | 47,00                 |
| 18             | 8,96  | 1            | 61,00                  | 152,20                  | 69,00                 |
| 19             | 8,97  | 1            | 56,00                  | 104,40                  | 88,00                 |
| 20             | 8,98  | 1            | 47,00                  | 143,00                  | 80,00                 |
| 21             | 8,99  | 1            | 56,00                  | 97,40                   | 68,00                 |
| 22             | 9,00  | 1            | 56,00                  | 132,80                  | 61,00                 |
| 23             | 9,03  | 1            | 54,00                  | 136,80                  | 66,00                 |
| 24             | 9,05  | 1            | 52,00                  | 81,40                   | 43,00                 |
| 25             | 9,05  | 1            | 41,00                  | 94,80                   | 41,00                 |
| 26             | 9,15  | 1            | 47,00                  | 99,40                   | 88,00                 |
| 27             | 9,15  | 1            | 59,00                  | 133,00                  | 90,00                 |
| 28             | 9,18  | 1            | 78,00                  | 78,20                   | 104,00                |
| 29             | 9,22  | 1            | 47,00                  | 83,20                   | 124,00                |
| 30             | 9,24  | 1            | 50,00                  | 106,80                  | 66,00                 |
| 31             | 9,26  | 1            | 67,00                  | 102,60                  | 37,00                 |
| 32             | 9,27  | 1            | 55,00                  | 91,80                   | 186,00                |
| 33             | 9,28  | 1            | 46,00                  | 82,00                   | 60,00                 |
| 34             | 9,33  | 1            | 51,00                  | 83,80                   | 76,00                 |
| 35             | 9,36  | 1            | 63,00                  | 100,80                  | 41,00                 |
| 36             | 9,36  | 1            | 45,00                  | 96,80                   | 101,00                |
| 37             | 9,37  | 1            | 40,00                  | 131,60                  | 112,00                |
| 38             | 9,38  | 1            | 49,00                  | 130,40                  | 88,00                 |
| 39             | 9,39  | 1            | 70,00                  | 118,40                  | 68,00                 |
| 40             | 9,42  | 1            | 57,00                  | 89,60                   | 142,00                |
| 41             | 9,48  | 1            | 50,00                  | 74,40                   | 58,00                 |
| 42             | 9,48  | 1            | 68,00                  | 91,40                   | 73,00                 |
| 43             | 9,50  | 1            | 80,00                  | 129,00                  | 110,00                |
| 44             | 9,50  | 1            | 85,00                  | 113,40                  | 58,00                 |
| 45             | 9,51  | 1            | 57,00                  | 71,00                   | 65,00                 |
| 46             | 9,54  | 1            | 63,00                  | 113,80                  | 56,00                 |
| 47             | 9,55  | 1            | 39,00                  | 82,60                   | 82,00                 |
| 48             | 9,55  | 1            | 49,00                  | 144,20                  | 104,00                |
| 49             | 9,56  | 1            | 50,00                  | 103,60                  | 37,00                 |
| 50             | 9,58  | 1            | 79,00                  | 71,20                   | 34,00                 |
| 51             | 9,59  | 2            | 62,00                  | 82,60                   | 67,00                 |
| 52             | 9,61  | 2            | 68,00                  | 106,80                  | 36,00                 |
| 53             | 9,62  | 2            | 56,00                  | 114,20                  | 89,00                 |
| 54             | 9,64  | 2            | 70,00                  | 80,20                   | 49,00                 |
| 55             | 9,66  | 2            | 64,00                  | 64,20                   | 64,00                 |
| 56             | 9,71  | 2            | 48,00                  | 84,00                   | 95,00                 |
| 57             | 9,72  | 2            | 67,00                  | 80,80                   | 46,00                 |
| 58             | 9,74  | 2            | 49,00                  | 127,80                  | 111,00                |
| 59             | 9,75  | 2            | 39,00                  | 83,20                   | 119,00                |
| 60             | 9,80  | 2            | 52,00                  | 85,40                   | 88,00                 |
| 61             | 9,81  | 2            | 62,00                  | 105,80                  | 101,00                |
| 62             | 9,81  | 2            | 55,00                  | 98,40                   | 153,00                |
| 63             | 9,82  | 2            | 58,00                  | 84,20                   | 49,00                 |
| 64             | 9,89  | 2            | 59,00                  | 83,20                   | 109,00                |
| 65             | 9,97  | 2            | 53,00                  | 70,00                   | 90,00                 |
| 66             | 9,98  | 2            | 47,00                  | 59,20                   | 64,00                 |
| 67             | 9,98  | 2            | 50,00                  | 123,00                  | 75,00                 |
| 68             | 10,01 | 2            | 54,00                  | 80,20                   | 94,00                 |
| 69             | 10,03 | 2            | 54,00                  | 98,40                   | 68,00                 |
| 70             | 10,05 | 2            | 58,00                  | 144,80                  | 56,00                 |

|     |       |   |       |        |        |
|-----|-------|---|-------|--------|--------|
| 71  | 10,09 | 2 | 60,00 | 67,00  | 60,00  |
| 72  | 10,12 | 2 | 57,00 | 85,80  | 41,00  |
| 73  | 10,24 | 2 | 55,00 | 106,20 | 54,00  |
| 74  | 10,27 | 2 | 49,00 | 106,40 | 58,00  |
| 75  | 10,36 | 2 | 31,00 | 128,40 | 103,00 |
| 76  | 10,37 | 2 | 55,00 | 121,80 | 51,00  |
| 77  | 10,39 | 2 | 56,00 | 88,80  | 61,00  |
| 78  | 10,39 | 2 | 49,00 | 127,40 | 113,00 |
| 79  | 10,51 | 2 | 64,00 | 135,60 | 72,00  |
| 80  | 10,61 | 2 | 60,00 | 102,80 | 51,00  |
| 81  | 10,62 | 2 | 53,00 | 105,00 | 95,00  |
| 82  | 10,63 | 2 | 47,00 | 100,40 | 68,00  |
| 83  | 10,77 | 2 | 50,00 | 138,00 | 75,00  |
| 84  | 10,77 | 2 | 60,00 | 95,80  | 56,00  |
| 85  | 10,86 | 2 | 63,00 | 64,40  | 83,00  |
| 86  | 10,89 | 2 | 68,00 | 107,00 | 165,00 |
| 87  | 10,95 | 2 | 41,00 | 68,80  | 46,00  |
| 88  | 10,97 | 2 | 49,00 | 171,00 | 90,00  |
| 89  | 11,00 | 2 | 65,00 | 122,00 | 65,00  |
| 90  | 11,02 | 2 | 48,00 | 117,20 | 69,00  |
| 91  | 11,15 | 2 | 26,00 | 176,20 | 189,00 |
| 92  | 11,17 | 2 | 43,00 | 131,00 | 140,00 |
| 93  | 11,21 | 2 | 37,00 | 103,80 | 51,00  |
| 94  | 11,24 | 2 | 51,00 | 90,20  | 34,00  |
| 95  | 11,25 | 2 | 48,00 | 144,40 | 143,00 |
| 96  | 11,26 | 2 | 46,00 | 125,80 | 56,00  |
| 97  | 11,31 | 2 | 58,00 | 115,60 | 52,00  |
| 98  | 11,33 | 2 | 65,00 | 76,00  | 55,00  |
| 99  | 11,36 | 3 | 56,00 | 125,80 | 81,00  |
| 100 | 11,36 | 3 | 49,00 | 64,60  | 91,00  |
| 101 | 11,37 | 3 | 52,00 | 101,40 | 103,00 |
| 102 | 11,40 | 3 | 48,00 | 132,20 | 49,00  |
| 103 | 11,44 | 3 | 63,00 | 112,00 | 425,00 |
| 104 | 11,45 | 3 | 43,00 | 116,20 | 79,00  |
| 105 | 11,45 | 3 | 54,00 | 98,00  | 50,00  |
| 106 | 11,46 | 3 | 50,00 | 121,60 | 157,00 |
| 107 | 11,48 | 3 | 52,00 | 97,20  | 154,00 |
| 108 | 11,62 | 3 | 54,00 | 143,60 | 162,00 |
| 109 | 11,66 | 3 | 59,00 | 82,20  | 94,00  |
| 110 | 11,70 | 3 | 57,00 | 114,40 | 68,00  |
| 111 | 11,71 | 3 | 58,00 | 92,60  | 152,00 |
| 112 | 11,73 | 3 | 54,00 | 163,60 | 92,00  |
| 113 | 11,81 | 3 | 42,00 | 98,20  | 109,00 |
| 114 | 11,84 | 3 | 52,00 | 148,60 | 352,00 |
| 115 | 11,90 | 3 | 46,00 | 130,80 | 106,00 |
| 116 | 12,01 | 3 | 50,00 | 164,00 | 70,00  |
| 117 | 12,02 | 3 | 37,00 | 101,40 | 213,00 |
| 118 | 12,08 | 3 | 35,00 | 85,80  | 101,00 |
| 119 | 12,08 | 3 | 38,00 | 75,80  | 106,00 |
| 120 | 12,11 | 3 | 39,00 | 76,40  | 88,00  |
| 121 | 12,11 | 3 | 47,00 | 122,60 | 132,00 |
| 122 | 12,11 | 3 | 32,00 | 104,80 | 241,00 |
| 123 | 12,13 | 3 | 55,00 | 98,20  | 294,00 |
| 124 | 12,17 | 3 | 35,00 | 80,80  | 241,00 |
| 125 | 12,20 | 3 | 37,00 | 144,80 | 71,00  |
| 126 | 12,26 | 3 | 43,00 | 89,20  | 54,00  |
| 127 | 12,29 | 3 | 27,00 | 100,40 | 168,00 |
| 128 | 12,36 | 3 | 68,00 | 58,40  | 68,00  |
| 129 | 12,38 | 3 | 31,00 | 65,60  | 287,00 |
| 130 | 12,42 | 3 | 45,00 | 153,40 | 133,00 |
| 131 | 12,50 | 3 | 42,00 | 117,00 | 85,00  |
| 132 | 12,51 | 3 | 38,00 | 82,60  | 167,00 |
| 133 | 12,52 | 3 | 40,00 | 84,40  | 158,00 |
| 134 | 12,52 | 3 | 46,00 | 108,20 | 284,00 |
| 135 | 12,53 | 3 | 46,00 | 155,20 | 329,00 |
| 136 | 12,54 | 3 | 60,00 | 107,00 | 60,00  |
| 137 | 12,56 | 3 | 62,00 | 97,00  | 60,00  |
| 138 | 12,69 | 3 | 45,00 | 91,00  | 145,00 |
| 139 | 12,77 | 3 | 36,00 | 122,00 | 60,00  |
| 140 | 12,79 | 3 | 46,00 | 182,00 | 200,00 |
| 141 | 12,79 | 3 | 32,00 | 82,20  | 84,00  |

|     |       |   |       |        |        |
|-----|-------|---|-------|--------|--------|
| 142 | 12,82 | 3 | 50,00 | 137,80 | 121,00 |
| 143 | 13,34 | 3 | 75,00 | 62,60  | 62,00  |
| 144 | 13,42 | 3 | 48,00 | 134,80 | 116,00 |
| 145 | 13,45 | 3 | 42,00 | 137,40 | 98,00  |
| 146 | 13,64 | 3 | 50,00 | 166,60 | 122,00 |
| 147 | 13,72 | 3 | 33,00 | 85,00  | 205,00 |
| 148 | 14,38 | 3 | 41,00 | 150,00 | 260,00 |
| 149 | 15,20 | 3 | 39,00 | 127,40 | 103,00 |
