# Supplementary material for: Evidence That Skeletal Muscles Modulate HDL-Cholesterol in Metabolic Healthy Young Adults
Source: MDPI journal article supplement (doi:10.3390/nu16081110), 2024-04-10
Supplement: s1 [file s1]

| PATIENT NUMBER | SMI   | SMI tertiles | HDL-Cholesterol (mg/dL) | LDL-Cholesterol (mg/dL) | Triglycerides (mg/dL) |
|----------------|-------|--------------|-------------------------|-------------------------|-----------------------|
| 1              | 8,16  | 1            | 57,00                   | 134,60                  | 97,00                 |
| 2              | 8,21  | 1            | 40,00                   | 81,20                   | 89,00                 |
| 3              | 8,26  | 1            | 65,00                   | 132,00                  | 155,00                |
| 4              | 8,33  | 1            | 52,00                   | 84,40                   | 48,00                 |
| 5              | 8,46  | 1            | 48,00                   | 102,60                  | 182,00                |
| 6              | 8,63  | 1            | 44,00                   | 65,00                   | 65,00                 |
| 7              | 8,64  | 1            | 33,00                   | 98,20                   | 44,00                 |
| 8              | 8,69  | 1            | 40,00                   | 65,60                   | 52,00                 |
| 9              | 8,75  | 1            | 66,00                   | 87,20                   | 54,00                 |
| 10             | 8,87  | 1            | 57,00                   | 131,60                  | 57,00                 |
| 11             | 8,89  | 1            | 51,00                   | 79,40                   | 178,00                |
| 12             | 8,93  | 1            | 39,00                   | 109,20                  | 34,00                 |
| 13             | 8,98  | 1            | 71,00                   | 91,60                   | 57,00                 |
| 14             | 8,99  | 1            | 80,00                   | 82,20                   | 39,00                 |
| 15             | 9,05  | 1            | 62,00                   | 86,40                   | 68,00                 |
| 16             | 9,07  | 1            | 47,00                   | 74,60                   | 62,00                 |
| 17             | 9,28  | 1            | 62,00                   | 196,60                  | 57,00                 |
| 18             | 9,37  | 1            | 90,00                   | 133,60                  | 57,00                 |
| 19             | 9,38  | 1            | 54,00                   | 89,00                   | 70,00                 |
| 20             | 9,41  | 2            | 47,00                   | 105,20                  | 139,00                |
| 21             | 9,46  | 2            | 51,00                   | 58,80                   | 46,00                 |
| 22             | 9,48  | 2            | 51,00                   | 102,80                  | 61,00                 |
| 23             | 9,49  | 2            | 69,00                   | 153,60                  | 112,00                |
| 24             | 9,52  | 2            | 64,00                   | 128,80                  | 106,00                |
| 25             | 9,54  | 2            | 61,00                   | 56,80                   | 56,00                 |
| 26             | 9,54  | 2            | 59,00                   | 93,80                   | 176,00                |
| 27             | 9,55  | 2            | 66,00                   | 201,20                  | 104,00                |
| 28             | 9,62  | 2            | 79,00                   | 94,00                   | 60,00                 |
| 29             | 9,63  | 2            | 46,00                   | 108,20                  | 79,00                 |
| 30             | 9,64  | 2            | 70,00                   | 92,80                   | 71,00                 |
| 31             | 9,70  | 2            | 57,00                   | 122,20                  | 54,00                 |
| 32             | 9,78  | 2            | 59,00                   | 155,80                  | 106,00                |
| 33             | 9,96  | 2            | 79,00                   | 106,20                  | 139,00                |
| 34             | 9,99  | 2            | 56,00                   | 92,40                   | 158,00                |
| 35             | 10,05 | 2            | 66,00                   | 116,80                  | 86,00                 |
| 36             | 10,13 | 3            | 65,00                   | 138,20                  | 89,00                 |
| 37             | 10,13 | 3            | 34,00                   | 97,60                   | 32,00                 |
| 38             | 10,13 | 3            | 67,00                   | 80,80                   | 66,00                 |
| 39             | 10,22 | 3            | 49,00                   | 98,40                   | 63,00                 |
| 40             | 10,28 | 3            | 50,00                   | 50,40                   | 93,00                 |
| 41             | 10,48 | 3            | 38,00                   | 128,80                  | 126,00                |
| 42             | 10,49 | 3            | 76,00                   | 123,20                  | 49,00                 |
| 43             | 10,56 | 3            | 50,00                   | 82,00                   | 65,00                 |
| 44             | 10,63 | 3            | 42,00                   | 112,80                  | 51,00                 |
| 45             | 10,87 | 3            | 49,00                   | 94,20                   | 44,00                 |
| 46             | 11,09 | 3            | 66,00                   | 101,20                  | 59,00                 |
| 47             | 11,32 | 3            | 33,00                   | 151,80                  | 331,00                |
| 48             | 11,34 | 3            | 47,00                   | 92,20                   | 64,00                 |
| 49             | 11,59 | 3            | 46,00                   | 92,20                   | 174,00                |
| 50             | 11,64 | 3            | 50,00                   | 86,00                   | 135,00                |
| 51             | 11,76 | 3            | 63,00                   | 116,20                  | 64,00                 |
| 52             | 11,84 | 3            | 44,00                   | 122,60                  | 87,00                 |
| 53             | 11,91 | 3            | 44,00                   | 110,60                  | 167,00                |
| 54             | 12,46 | 3            | 60,00                   | 160,00                  | 220,00                |
| 55             | 13,28 | 3            | 47,00                   | 110,80                  | 81,00                 |
