# Supplementary material for: Evidence That Skeletal Muscles Modulate HDL-Cholesterol in Metabolic Healthy Young Adults
Source: MDPI journal article supplement (doi:10.3390/nu16081110), 2024-04-10
Supplement: s1 [file s1]

| PATIENT NUMBER | SMI   | SMI tertiles | HDL-Cholesterol (mg/dL) | LDL-Cholesterol (mg/dL) | Triglycerides (mg/dL) |
|----------------|-------|--------------|-------------------------|-------------------------|-----------------------|
| 1              | 9,05  | 1            | 46,74                   | 91,26                   | 70,00                 |
| 2              | 9,16  | 1            | 45,00                   | 86,80                   | 131,00                |
| 3              | 9,27  | 1            | 72,00                   | 99,00                   | 60,00                 |
| 4              | 9,32  | 1            | 54,00                   | 104,40                  | 78,00                 |
| 5              | 9,39  | 1            | 33,00                   | 127,40                  | 98,00                 |
| 6              | 9,40  | 1            | 52,00                   | 48,40                   | 128,00                |
| 7              | 9,51  | 1            | 54,00                   | 90,60                   | 67,00                 |
| 8              | 9,58  | 1            | 41,00                   | 128,80                  | 151,00                |
| 9              | 9,62  | 1            | 47,00                   | 122,60                  | 72,00                 |
| 10             | 9,63  | 1            | 71,00                   | 109,80                  | 136,00                |
| 11             | 9,68  | 1            | 41,00                   | 150,20                  | 104,00                |
| 12             | 9,76  | 1            | 58,00                   | 120,60                  | 92,00                 |
| 13             | 9,76  | 1            | 60,00                   | 81,00                   | 20,00                 |
| 14             | 9,78  | 1            | 65,00                   | 93,60                   | 117,00                |
| 15             | 9,78  | 1            | 45,00                   | 107,80                  | 51,00                 |
| 16             | 9,79  | 1            | 72,00                   | 115,60                  | 122,00                |
| 17             | 9,84  | 1            | 48,00                   | 84,40                   | 73,00                 |
| 18             | 9,90  | 1            | 41,00                   | 74,20                   | 49,00                 |
| 19             | 9,96  | 1            | 46,00                   | 108,80                  | 146,00                |
| 20             | 9,96  | 1            | 50,00                   | 66,40                   | 68,00                 |
| 21             | 10,00 | 1            | 64,00                   | 96,40                   | 73,00                 |
| 22             | 10,00 | 1            | 60,00                   | 145,80                  | 91,00                 |
| 23             | 10,01 | 1            | 52,00                   | 118,80                  | 56,00                 |
| 24             | 10,02 | 1            | 64,00                   | 120,00                  | 80,00                 |
| 25             | 10,02 | 1            | 50,00                   | 152,60                  | 107,00                |
| 26             | 10,10 | 1            | 74,00                   | 118,20                  | 109,00                |
| 27             | 10,12 | 1            | 46,00                   | 81,20                   | 74,00                 |
| 28             | 10,12 | 1            | 47,00                   | 71,60                   | 262,00                |
| 29             | 10,14 | 1            | 81,00                   | 118,40                  | 63,00                 |
| 30             | 10,15 | 1            | 53,00                   | 73,00                   | 115,00                |
| 31             | 10,18 | 1            | 71,00                   | 137,00                  | 85,00                 |
| 32             | 10,19 | 1            | 75,00                   | 104,60                  | 67,00                 |
| 33             | 10,20 | 1            | 62,00                   | 133,80                  | 116,00                |
| 34             | 10,21 | 1            | 60,00                   | 114,00                  | 45,00                 |
| 35             | 10,22 | 1            | 35,00                   | 93,40                   | 43,00                 |
| 36             | 10,24 | 1            | 33,00                   | 136,60                  | 122,00                |
| 37             | 10,27 | 1            | 42,00                   | 105,80                  | 131,00                |
| 38             | 10,28 | 1            | 62,00                   | 90,40                   | 58,00                 |
| 39             | 10,30 | 1            | 45,00                   | 79,20                   | 114,00                |
| 40             | 10,32 | 1            | 52,00                   | 77,80                   | 76,00                 |
| 41             | 10,32 | 1            | 47,00                   | 106,00                  | 70,00                 |
| 42             | 10,33 | 1            | 81,00                   | 109,60                  | 67,00                 |
| 43             | 10,33 | 1            | 62,00                   | 67,20                   | 109,00                |
| 44             | 10,35 | 1            | 47,00                   | 117,60                  | 47,00                 |
| 45             | 10,37 | 1            | 45,00                   | 104,80                  | 91,00                 |
| 46             | 10,40 | 1            | 64,00                   | 88,80                   | 41,00                 |
| 47             | 10,41 | 1            | 39,00                   | 108,20                  | 99,00                 |
| 48             | 10,44 | 1            | 65,00                   | 92,40                   | 108,00                |
| 49             | 10,45 | 1            | 48,00                   | 139,80                  | 136,00                |
| 50             | 10,45 | 1            | 30,00                   | 140,00                  | 180,00                |
| 51             | 10,45 | 1            | 71,00                   | 93,40                   | 143,00                |
| 52             | 10,50 | 1            | 30,00                   | 107,40                  | 113,00                |
| 53             | 10,51 | 1            | 62,00                   | 122,00                  | 220,00                |
| 54             | 10,53 | 1            | 57,00                   | 79,20                   | 79,00                 |
| 55             | 10,55 | 1            | 54,00                   | 91,20                   | 44,00                 |
| 56             | 10,57 | 1            | 36,00                   | 117,00                  | 125,00                |
| 57             | 10,60 | 1            | 41,00                   | 135,40                  | 98,00                 |
| 58             | 10,62 | 1            | 42,00                   | 160,40                  | 193,00                |
| 59             | 10,64 | 1            | 68,00                   | 52,00                   | 35,00                 |
| 60             | 10,66 | 1            | 43,00                   | 143,40                  | 173,00                |
| 61             | 10,67 | 1            | 47,00                   | 138,00                  | 135,00                |
| 62             | 10,68 | 1            | 50,00                   | 133,00                  | 45,00                 |
| 63             | 10,69 | 1            | 32,00                   | 64,00                   | 65,00                 |
| 64             | 10,70 | 1            | 48,00                   | 90,80                   | 156,00                |
| 65             | 10,72 | 1            | 56,00                   | 143,00                  | 80,00                 |
| 66             | 10,77 | 1            | 64,40                   | 141,60                  | 80,00                 |
| 67             | 10,78 | 1            | 52,00                   | 116,00                  | 155,00                |
| 68             | 10,78 | 1            | 40,00                   | 107,80                  | 161,00                |
| 69             | 10,82 | 1            | 61,00                   | 163,60                  | 82,00                 |
| 70             | 10,83 | 1            | 60,00                   | 73,60                   | 102,00                |
| 71             | 10,89 | 1            | 50,00                   | 99,20                   | 199,00                |
| 72             | 10,94 | 1            | 47,00                   | 131,40                  | 138,00                |
| 73             | 10,94 | 1            | 51,00                   | 97,80                   | 91,00                 |
| 74             | 10,95 | 1            | 29,00                   | 81,60                   | 112,00                |
| 75             | 10,96 | 1            | 50,00                   | 126,80                  | 61,00                 |

|     |       |   |       |        |        |
|-----|-------|---|-------|--------|--------|
| 76  | 10,96 | 1 | 38,00 | 111,60 | 102,00 |
| 77  | 10,96 | 1 | 70,00 | 80,00  | 135,00 |
| 78  | 10,97 | 1 | 61,00 | 109,60 | 52,00  |
| 79  | 10,99 | 1 | 45,00 | 94,80  | 71,00  |
| 80  | 11,00 | 1 | 41,00 | 129,20 | 114,00 |
| 81  | 11,00 | 1 | 61,00 | 141,40 | 128,00 |
| 82  | 11,05 | 1 | 66,00 | 129,20 | 84,00  |
| 83  | 11,06 | 2 | 61,00 | 112,60 | 177,00 |
| 84  | 11,09 | 2 | 42,00 | 144,60 | 167,00 |
| 85  | 11,10 | 2 | 57,00 | 96,40  | 158,00 |
| 86  | 11,10 | 2 | 39,00 | 84,80  | 191,00 |
| 87  | 11,11 | 2 | 64,00 | 91,20  | 104,00 |
| 88  | 11,13 | 2 | 51,00 | 82,00  | 55,00  |
| 89  | 11,13 | 2 | 44,00 | 97,40  | 73,00  |
| 90  | 11,16 | 2 | 46,00 | 147,60 | 132,00 |
| 91  | 11,18 | 2 | 48,00 | 151,00 | 80,00  |
| 92  | 11,19 | 2 | 44,00 | 148,80 | 156,00 |
| 93  | 11,21 | 2 | 30,00 | 96,20  | 94,00  |
| 94  | 11,22 | 2 | 61,00 | 116,60 | 97,00  |
| 95  | 11,22 | 2 | 40,00 | 113,80 | 141,00 |
| 96  | 11,25 | 2 | 38,00 | 118,00 | 105,00 |
| 97  | 11,28 | 2 | 36,00 | 100,80 | 171,00 |
| 98  | 11,30 | 2 | 54,00 | 81,40  | 158,00 |
| 99  | 11,32 | 2 | 55,00 | 73,80  | 41,00  |
| 100 | 11,38 | 2 | 60,00 | 127,60 | 137,00 |
| 101 | 11,42 | 2 | 42,00 | 58,40  | 173,00 |
| 102 | 11,42 | 2 | 64,00 | 95,00  | 65,00  |
| 103 | 11,44 | 2 | 74,00 | 88,60  | 102,00 |
| 104 | 11,46 | 2 | 42,00 | 99,00  | 190,00 |
| 105 | 11,46 | 2 | 73,00 | 121,40 | 78,00  |
| 106 | 11,48 | 2 | 75,00 | 110,20 | 164,00 |
| 107 | 11,49 | 2 | 46,00 | 108,60 | 242,00 |
| 108 | 11,49 | 2 | 51,00 | 116,20 | 89,00  |
| 109 | 11,50 | 2 | 31,00 | 79,60  | 112,00 |
| 110 | 11,51 | 2 | 46,00 | 121,60 | 137,00 |
| 111 | 11,53 | 2 | 52,00 | 93,60  | 57,00  |
| 112 | 11,53 | 2 | 39,00 | 146,00 | 125,00 |
| 113 | 11,54 | 2 | 55,00 | 136,00 | 145,00 |
| 114 | 11,55 | 2 | 42,00 | 120,60 | 112,00 |
| 115 | 11,56 | 2 | 50,00 | 87,20  | 154,00 |
| 116 | 11,58 | 2 | 48,00 | 130,00 | 90,00  |
| 117 | 11,60 | 2 | 63,00 | 93,80  | 231,00 |
| 118 | 11,62 | 2 | 33,00 | 138,60 | 112,00 |
| 119 | 11,62 | 2 | 47,00 | 110,00 | 180,00 |
| 120 | 11,63 | 2 | 36,00 | 153,60 | 247,00 |
| 121 | 11,64 | 2 | 42,00 | 89,00  | 250,00 |
| 122 | 11,64 | 2 | 43,00 | 76,20  | 139,00 |
| 123 | 11,64 | 2 | 55,00 | 137,40 | 208,00 |
| 124 | 11,64 | 2 | 35,00 | 100,80 | 156,00 |
| 125 | 11,67 | 2 | 48,00 | 97,80  | 46,00  |
| 126 | 11,68 | 2 | 46,00 | 114,40 | 63,00  |
| 127 | 11,70 | 2 | 45,00 | 99,80  | 66,00  |
| 128 | 11,72 | 2 | 35,00 | 184,80 | 121,00 |
| 129 | 11,74 | 2 | 59,00 | 85,20  | 99,00  |
| 130 | 11,75 | 2 | 40,00 | 77,40  | 123,00 |
| 131 | 11,76 | 2 | 43,00 | 181,00 | 145,00 |
| 132 | 11,77 | 2 | 51,00 | 147,60 | 272,00 |
| 133 | 11,80 | 2 | 32,00 | 58,80  | 136,00 |
| 134 | 11,83 | 2 | 50,00 | 109,40 | 253,00 |
| 135 | 11,86 | 2 | 46,00 | 137,40 | 228,00 |
| 136 | 11,86 | 2 | 46,00 | 67,40  | 38,00  |
| 137 | 11,87 | 2 | 52,00 | 87,20  | 244,00 |
| 138 | 11,89 | 2 | 52,00 | 94,80  | 66,00  |
| 139 | 11,93 | 2 | 56,00 | 105,60 | 57,00  |
| 140 | 11,94 | 2 | 56,00 | 179,00 | 155,00 |
| 141 | 11,96 | 2 | 51,00 | 151,60 | 207,00 |
| 142 | 11,98 | 2 | 40,00 | 69,00  | 90,00  |
| 143 | 11,99 | 2 | 36,00 | 112,00 | 130,00 |
| 144 | 12,00 | 2 | 45,00 | 109,80 | 81,00  |
| 145 | 12,02 | 2 | 42,00 | 162,40 | 183,00 |
| 146 | 12,04 | 2 | 44,00 | 223,00 | 120,00 |
| 147 | 12,14 | 2 | 31,00 | 114,40 | 93,00  |
| 148 | 12,16 | 2 | 41,00 | 138,00 | 130,00 |
| 149 | 12,17 | 2 | 58,00 | 104,60 | 182,00 |
| 150 | 12,17 | 3 | 45,00 | 107,20 | 134,00 |
| 151 | 12,17 | 2 | 37,00 | 118,80 | 141,00 |

|     |       |   |       |        |        |
|-----|-------|---|-------|--------|--------|
| 152 | 12,21 | 2 | 44,00 | 96,60  | 82,00  |
| 153 | 12,21 | 2 | 52,00 | 95,00  | 40,00  |
| 154 | 12,23 | 2 | 42,00 | 182,00 | 195,00 |
| 155 | 12,24 | 2 | 40,00 | 105,80 | 396,00 |
| 156 | 12,25 | 2 | 44,00 | 137,00 | 170,00 |
| 157 | 12,29 | 2 | 32,00 | 90,00  | 80,00  |
| 158 | 12,31 | 2 | 27,00 | 56,20  | 254,00 |
| 159 | 12,32 | 2 | 50,00 | 88,40  | 168,00 |
| 160 | 12,38 | 2 | 30,00 | 160,20 | 144,00 |
| 161 | 12,41 | 2 | 47,00 | 163,60 | 107,00 |
| 162 | 12,42 | 2 | 65,00 | 96,80  | 136,00 |
| 163 | 12,42 | 2 | 53,00 | 72,40  | 93,00  |
| 164 | 12,43 | 3 | 51,00 | 137,40 | 193,00 |
| 165 | 12,43 | 3 | 66,00 | 101,80 | 131,00 |
| 166 | 12,44 | 3 | 44,00 | 147,40 | 83,00  |
| 167 | 12,45 | 3 | 36,00 | 91,20  | 114,00 |
| 168 | 12,46 | 3 | 40,00 | 110,80 | 136,00 |
| 169 | 12,49 | 3 | 46,00 | 98,00  | 130,00 |
| 170 | 12,51 | 3 | 49,00 | 186,80 | 61,00  |
| 171 | 12,53 | 3 | 49,00 | 96,80  | 106,00 |
| 172 | 12,53 | 3 | 39,00 | 159,00 | 265,00 |
| 173 | 12,57 | 3 | 43,00 | 159,20 | 259,00 |
| 174 | 12,60 | 3 | 41,00 | 120,80 | 236,00 |
| 175 | 12,63 | 3 | 34,00 | 97,40  | 148,00 |
| 176 | 12,64 | 3 | 44,00 | 143,20 | 94,00  |
| 177 | 12,64 | 3 | 56,00 | 148,60 | 77,00  |
| 178 | 12,66 | 3 | 53,00 | 108,40 | 153,00 |
| 179 | 12,70 | 3 | 34,00 | 137,00 | 120,00 |
| 180 | 12,73 | 3 | 40,00 | 213,20 | 114,00 |
| 181 | 12,74 | 3 | 67,00 | 80,80  | 46,00  |
| 182 | 12,74 | 3 | 36,00 | 125,20 | 99,00  |
| 183 | 12,76 | 3 | 32,00 | 74,60  | 212,00 |
| 184 | 12,78 | 3 | 46,00 | 144,00 | 115,00 |
| 185 | 12,81 | 3 | 35,00 | 113,00 | 75,00  |
| 186 | 12,82 | 3 | 59,00 | 140,80 | 176,00 |
| 187 | 12,86 | 3 | 52,00 | 128,00 | 90,00  |
| 188 | 12,87 | 3 | 41,00 | 113,80 | 91,00  |
| 189 | 12,87 | 3 | 52,00 | 139,00 | 250,00 |
| 190 | 12,88 | 3 | 46,00 | 152,20 | 199,00 |
| 191 | 12,89 | 3 | 42,00 | 176,00 | 105,00 |
| 192 | 12,89 | 3 | 35,50 | 91,90  | 93,00  |
| 193 | 12,89 | 3 | 43,00 | 77,00  | 175,00 |
| 194 | 12,92 | 3 | 54,00 | 73,60  | 122,00 |
| 195 | 12,93 | 3 | 42,00 | 101,40 | 108,00 |
| 196 | 12,96 | 3 | 37,00 | 106,40 | 153,00 |
| 197 | 12,96 | 3 | 36,00 | 163,00 | 275,00 |
| 198 | 12,98 | 3 | 46,00 | 181,60 | 177,00 |
| 199 | 13,03 | 3 | 57,00 | 96,60  | 72,00  |
| 200 | 13,04 | 3 | 50,00 | 88,60  | 207,00 |
| 201 | 13,08 | 3 | 37,00 | 83,80  | 106,00 |
| 202 | 13,15 | 3 | 36,00 | 201,00 | 130,00 |
| 203 | 13,16 | 3 | 42,00 | 145,80 | 126,00 |
| 204 | 13,19 | 3 | 39,00 | 142,40 | 93,00  |
| 205 | 13,19 | 3 | 47,00 | 104,20 | 64,00  |
| 206 | 13,19 | 3 | 38,00 | 68,80  | 101,00 |
| 207 | 13,29 | 3 | 40,00 | 99,20  | 109,00 |
| 208 | 13,34 | 3 | 42,00 | 130,00 | 85,00  |
| 209 | 13,36 | 3 | 43,00 | 152,60 | 172,00 |
| 210 | 13,39 | 3 | 38,00 | 82,00  | 350,00 |
| 211 | 13,43 | 3 | 52,00 | 128,00 | 90,00  |
| 212 | 13,55 | 3 | 38,00 | 127,60 | 232,00 |
| 213 | 13,60 | 3 | 60,00 | 163,80 | 176,00 |
| 214 | 13,65 | 3 | 33,00 | 88,40  | 168,00 |
| 215 | 13,66 | 3 | 50,00 | 120,00 | 80,00  |
| 216 | 13,71 | 3 | 31,00 | 96,20  | 304,00 |
| 217 | 13,72 | 3 | 54,00 | 157,40 | 203,00 |
| 218 | 13,73 | 3 | 52,00 | 155,80 | 291,00 |
| 219 | 13,74 | 3 | 46,00 | 179,40 | 128,00 |
| 220 | 13,75 | 3 | 43,00 | 126,60 | 227,00 |
| 221 | 13,76 | 3 | 42,00 | 170,00 | 115,00 |
| 222 | 13,79 | 3 | 56,00 | 79,60  | 72,00  |
| 223 | 13,79 | 3 | 35,00 | 147,00 | 145,00 |
| 224 | 13,82 | 3 | 46,00 | 147,00 | 150,00 |
| 225 | 13,89 | 3 | 37,00 | 159,40 | 163,00 |
| 226 | 13,94 | 3 | 45,00 | 119,80 | 186,00 |
| 227 | 13,98 | 3 | 64,00 | 89,80  | 71,00  |

|     |       |   |       |        |        |
|-----|-------|---|-------|--------|--------|
| 228 | 13,99 | 3 | 42,00 | 131,60 | 77,00  |
| 229 | 14,04 | 3 | 45,00 | 159,20 | 89,00  |
| 230 | 14,31 | 3 | 37,00 | 88,80  | 121,00 |
| 231 | 14,31 | 3 | 39,00 | 147,20 | 199,00 |
| 232 | 14,39 | 3 | 41,00 | 122,00 | 220,00 |
| 233 | 14,43 | 3 | 32,00 | 156,60 | 172,00 |
| 234 | 14,45 | 3 | 49,00 | 111,20 | 124,00 |
| 235 | 14,60 | 3 | 41,00 | 96,80  | 146,00 |
| 236 | 14,61 | 3 | 59,00 | 237,00 | 210,00 |
| 237 | 14,68 | 3 | 53,00 | 147,60 | 197,00 |
| 238 | 14,74 | 3 | 34,00 | 85,00  | 230,00 |
| 239 | 14,90 | 3 | 48,00 | 106,20 | 214,00 |
| 240 | 14,91 | 3 | 50,00 | 91,40  | 163,00 |
| 241 | 14,92 | 3 | 39,00 | 147,00 | 170,00 |
| 242 | 15,02 | 3 | 39,00 | 114,80 | 146,00 |
| 243 | 15,40 | 3 | 42,00 | 102,40 | 103,00 |
| 244 | 15,59 | 3 | 42,00 | 158,20 | 124,00 |
| 245 | 15,65 | 3 | 35,00 | 99,60  | 252,00 |
| 246 | 16,67 | 3 | 69,00 | 109,40 | 58,00  |
